# Supplementary material
Source: MDPI journal article supplement (https://www.mdpi.com/2073-4352/12/8/1157)
Supplement: s1 [file s1]

# Computational Investigation of the Stability of Di-*p*-Tolyl Disulfide “Hidden” and “Conventional” Polymorphs at High Pressures

## Supplementary Information

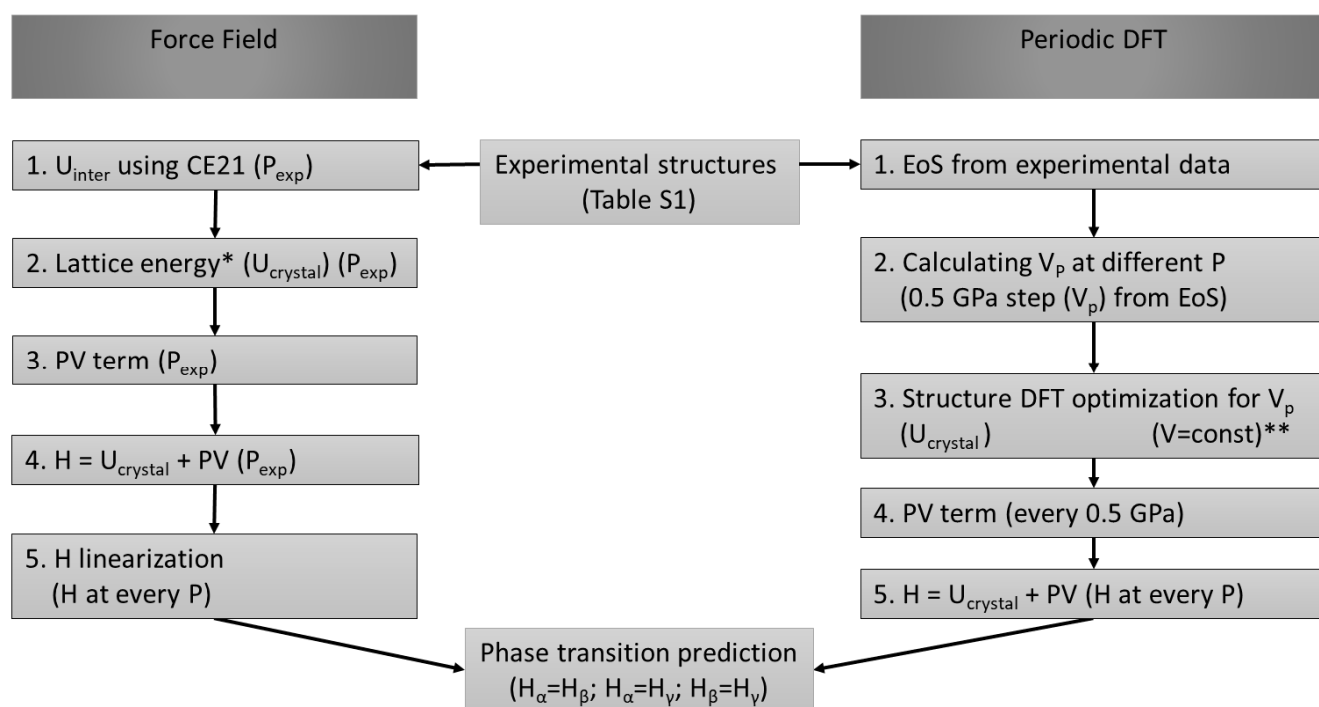

**Scheme S1.** An overall workflow of computational procedures. \*Lattice energy can either be calculated as  $U_{\text{inter}}$  or  $U_{\text{inter}} + U_{\text{intra}}$ , where  $U_{\text{intra}}$  is calculated in CE21, while  $U_{\text{intra}}$  from ref. [14]. \*\*V = const means that unit cell volume is fixed, while cell parameters and atom positions are optimized using DFT (ISIF = 4). For FF methods experimental structures are used at steps 1–4, while for periodic DFT only at step 1.

**Table S1.** Summarized structural data for *p*-Tol<sub>2</sub>S<sub>2</sub> polymorphs used in CE21 and EoSFit7 calculations.

| Polymorph | CCDC Refcode | Pressure, GPa | a, Å       | b, Å      | c, Å       | $\alpha$ , ° | $\beta$ , ° | $\gamma$ , ° | Volume, Å <sup>3</sup> | Space group |
|-----------|--------------|---------------|------------|-----------|------------|--------------|-------------|--------------|------------------------|-------------|
| $\alpha$  | IPIXUB06     | 0.0001        | 7.593(<1)  | 5.713(<1) | 14.722(<1) | 90           | 94.76(<1)   | 90           | 636.414                | P21         |
| $\alpha$  | IPIXUB02     | 0.15          | 7.570(5)   | 5.667(2)  | 14.710(80) | 90           | 94.90(20)   | 90           | 628.741                | P21         |
| $\alpha$  | IPIXUB03     | 0.6           | 7.483(3)   | 5.588(1)  | 14.530(60) | 90           | 94.83(15)   | 90           | 605.436                | P21         |
| $\alpha$  | IPIXUB04     | 1.38          | 7.346(4)   | 5.441(3)  | 14.400(80) | 90           | 94.56(16)   | 90           | 573.74                 | P21         |
| $\alpha$  | IPIXUB11     | 1.28          | 7.344(1)   | 5.467(<1) | 14.360(40) | 90           | 94.50(7)    | 90           | 574.806                | P21         |
| $\alpha$  | IPIXUB05     | 1.52          | 7.319(1)   | 5.428(1)  | 14.370(30) | 90           | 94.93(7)    | 90           | 568.764                | P21         |
| $\beta$   | IPIXUB14     | 1.72          | 7.306(1)   | 5.509(1)  | 14.038(3)  | 95.14(3)     | 97.23(3)    | 85.36(3)     | 556.885                | P1          |
| $\beta$   | IPIXUB13     | 1.85          | 7.285(<1)  | 5.518(<1) | 14.024(5)  | 95.30(1)     | 97.37(1)    | 85.32(<1)    | 555.359                | P1          |
| $\beta$   | IPIXUB07     | 2.2           | 7.247(<1)  | 5.500(<1) | 13.926(4)  | 95.54(1)     | 97.67(1)    | 85.03(<1)    | 545.963                | P1          |
| $\beta$   | IPIXUB15     | 2.8           | 7.193(<1)  | 5.469(<1) | 13.814(4)  | 95.92(1)     | 98.14(1)    | 84.70(<1)    | 533.389                | P1          |
| $\gamma$  | IPIXUB08     | 0.45          | 15.260(20) | 5.962(<1) | 14.615(10) | 90           | 115.56(14)  | 90           | 1199.544               | P21/c       |
| $\gamma$  | IPIXUB09     | 0.71          | 15.020(30) | 5.931(<1) | 14.587(14) | 90           | 115.73(19)  | 90           | 1170.522               | P21/c       |
| $\gamma$  | IPIXUB16     | 1.38          | 14.720(30) | 5.810(<1) | 14.362(11) | 90           | 114.98(16)  | 90           | 1113.442               | P21/c       |
| $\gamma$  | IPIXUB12     | 2.15          | 14.360(80) | 5.759(1)  | 14.260(30) | 90           | 114.90(50)  | 90           | 1069.725               | P21/c       |
| $\gamma$  | IPIXUB10     | 2.8           | 14.090(60) | 5.703(1)  | 14.180(20) | 90           | 114.80(30)  | 90           | 1034.338               | P21/c       |

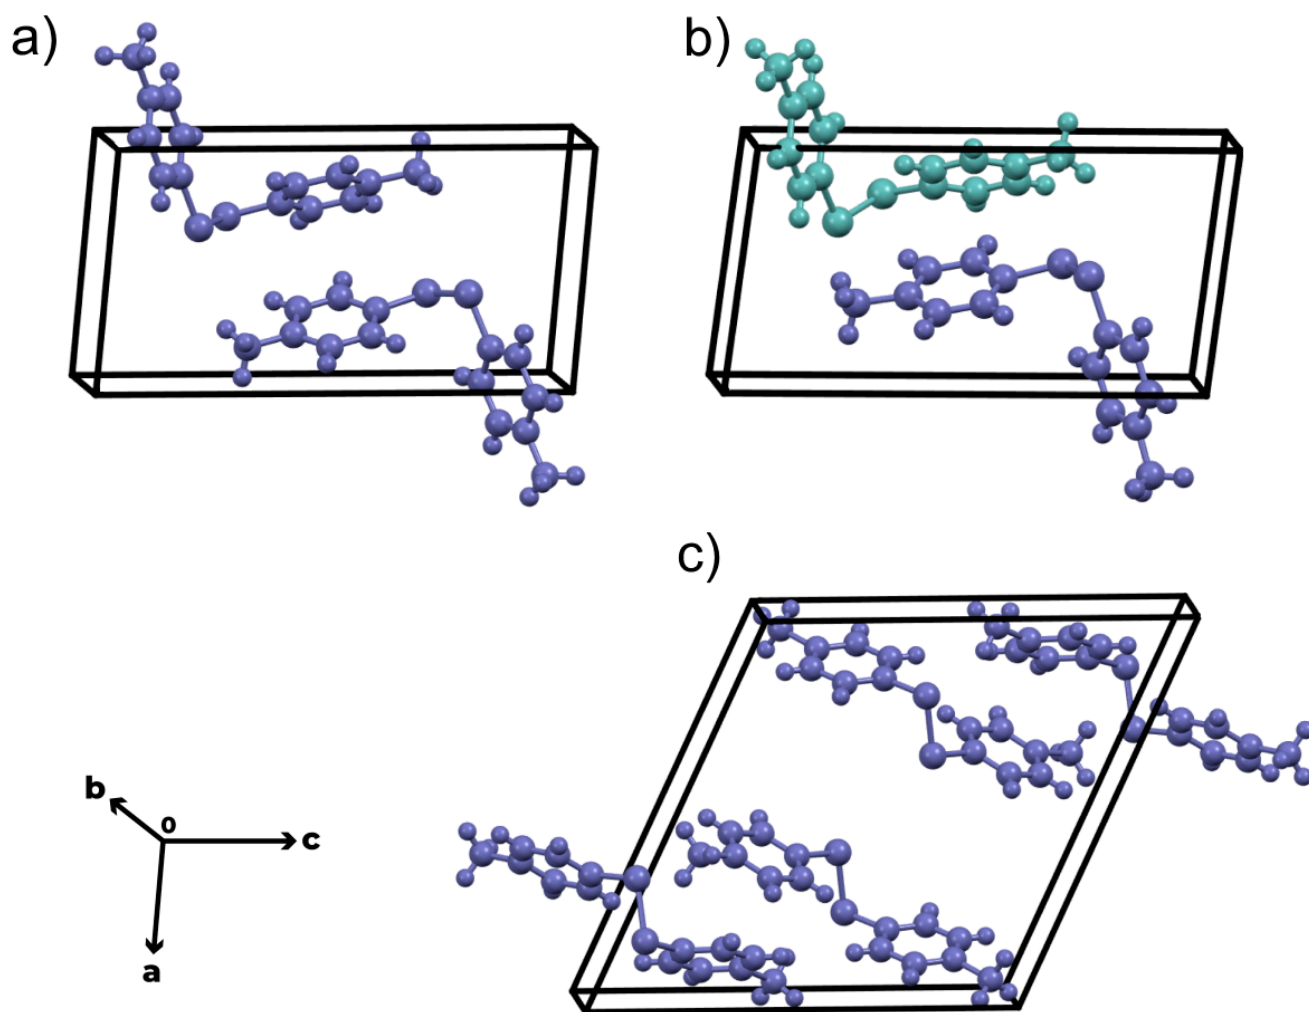**Figure S1.** Crystal structures of (a) alpha, (b) beta and (c) gamma polymorphs of *p*-Tol<sub>2</sub>S<sub>2</sub>. Colors according to symmetry equivalence in corresponding crystal structures.

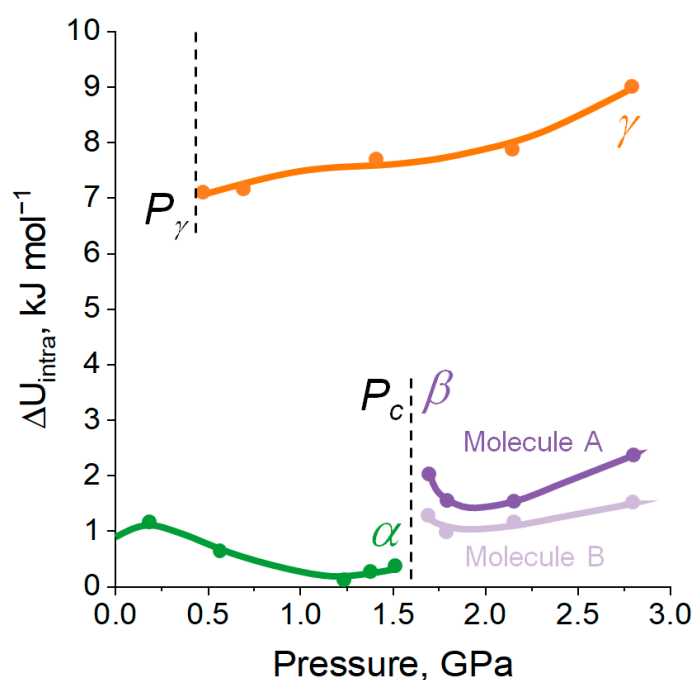

**Figure S2.** Potential energy changes ( $\Delta E_p$ ) calculated by Gaussian (Experimental Section of [14]) for the isolated molecule in its conformation, experimentally determined in the *p*-TolS<sub>2</sub> structures of phases  $\alpha$ ,  $\beta$ , and  $\gamma$ . The atomic coordinates determined by the diffraction measurements reported as the starting models. Full optimizations, except for soft torsion angles  $\tau/\tau_1/\tau_2$  fixed at the values present in phases  $\alpha/\beta/\gamma$ , were performed in the original study [14]. For all the quantum mechanical calculations, the program Gaussian09 was applied. Figure adapted from [14], keeping the original designations.

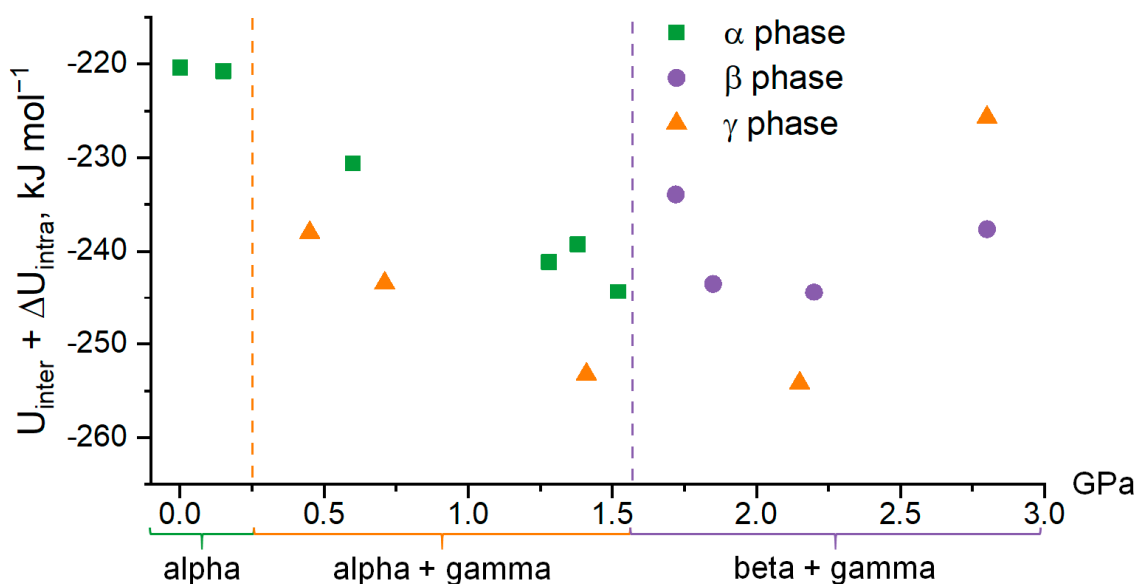

**Figure S3.** Lattice energies (the sum of  $U_{\text{inter}}$  and  $U_{\text{intra}}$ ) of phases  $\alpha$ ,  $\beta$ , and  $\gamma$  as a function of pressure calculated based on experimental data. Regions of structural stability according to experimental data are shown with dashed lines.  $U_{\text{intra}}$  is reproduced from work [14], Figure S2.

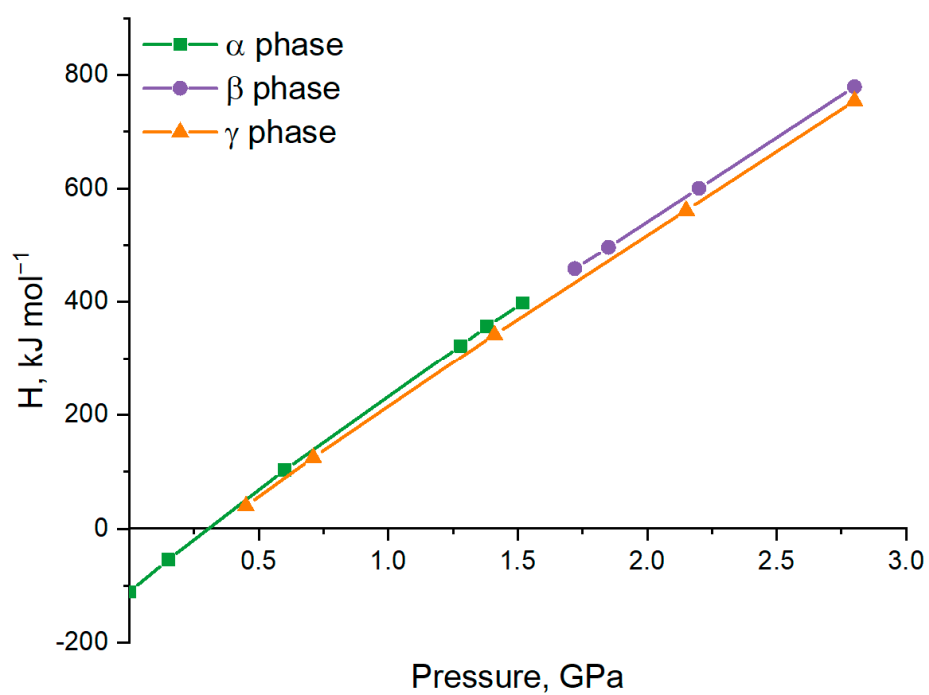

**Figure S4.** Enthalpies of phases  $\alpha$ ,  $\beta$ , and  $\gamma$  as a function of pressure calculated based on experimental data using CE21.

**Table S2.** Predicted by FF and experimental phase transition pressures.

| Phase transition            | Calculated from FF method (CE21) | Reported experimental data |
|-----------------------------|----------------------------------|----------------------------|
| $\alpha \rightarrow \beta$  | 1.45                             | 1.60                       |
| $\alpha \rightarrow \gamma$ | 0.44                             | 0.45                       |
| $\gamma \rightarrow \beta$  | 6.12                             | no data                    |

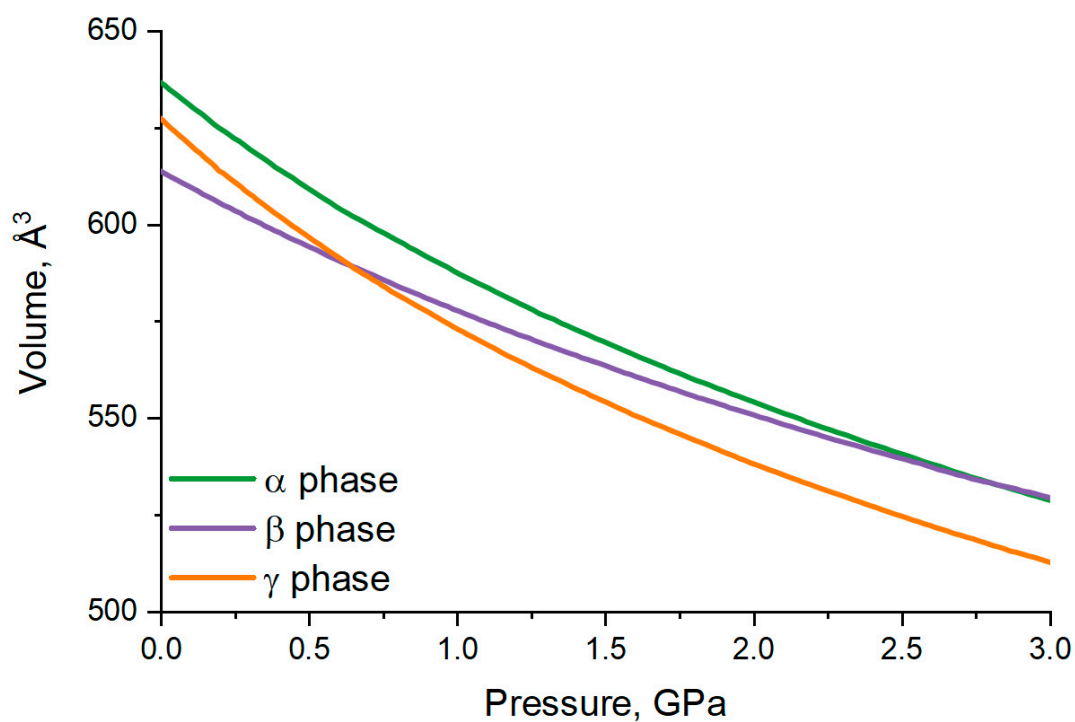

**Figure S5.** *p*-Tol2S<sub>2</sub> volume-pressure dependence based on calculated EoS.

**Table S3.** EoS Birch-Murnaghan 3<sup>rd</sup> order coefficients.  $V_0$  — reference pressure volume at ambient pressure,  $K_0$  — bulk modulus,  $K_p$  — derivative of Bulk Modulus ( $dK/dP$ ).

| Polymorph | $V_0, \text{\AA}^3$ | $K_0, \text{GPa}$ | $K_p$  |
|-----------|---------------------|-------------------|--------|
| $\alpha$  | 636.414             | 10.242            | 4.9360 |
| $\beta$   | 613.579             | 14.401            | 4.6549 |
| $\gamma$  | 627.144             | 8.695             | 5.3616 |

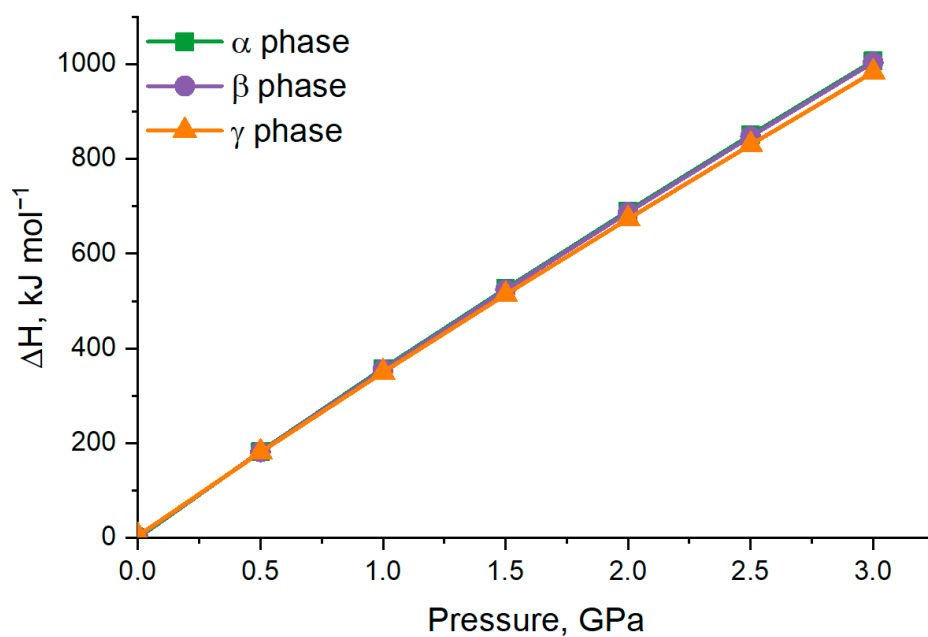

**Figure S6.** Enthalpies of phases  $\alpha$ ,  $\beta$ , and  $\gamma$  as a function of pressure calculated using periodic DFT and EoS. No linearization was applied. Please see Figure S7 and Table S5 for estimation of linearization accuracy to calculate relative phase stability.

**Table S4.** Relative stability of *p*-Tol<sub>2</sub>S<sub>2</sub> polymorphs in different pressure ranges calculated by periodic DFT.

| Pressure range, GPa | Stability rank  |                  |                 |
|---------------------|-----------------|------------------|-----------------|
|                     | 1 (Most stable) | 2 (Intermediate) | 3 (Less stable) |
| 0.00–0.33           | $\alpha$        | $\beta$          | $\gamma$        |
| 0.33–0.34           | $\alpha$        | $\gamma$         | $\beta$         |
| 0.34–0.36           | $\gamma$        | $\alpha$         | $\beta$         |
| 0.36–3.00           | $\gamma$        | $\beta$          | $\alpha$        |

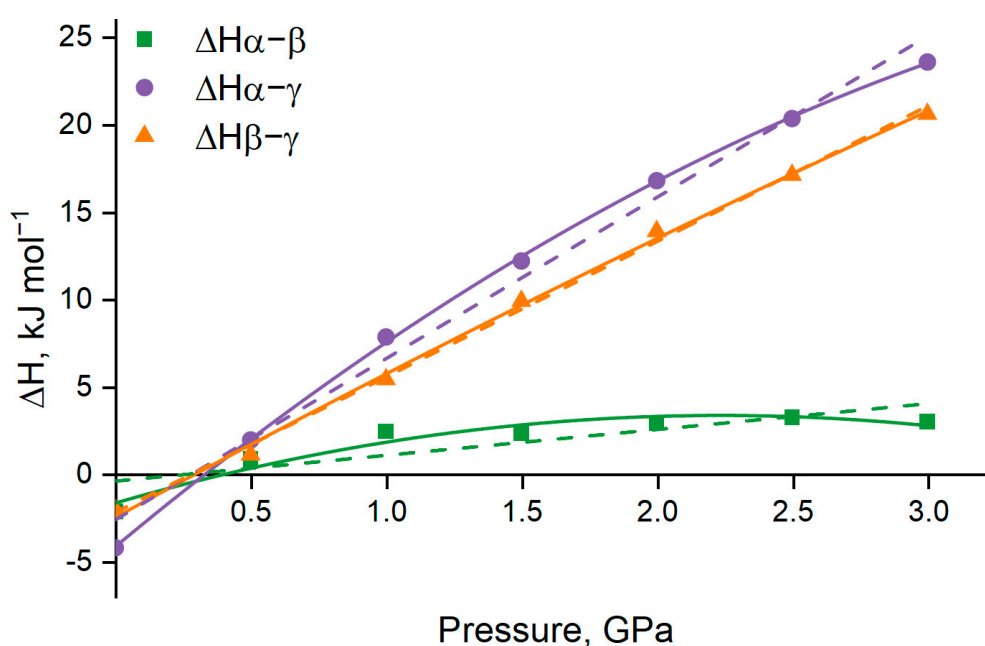

**Figure S7.**  $\Delta H$  differences between *p*-Tol<sub>2</sub>S<sub>2</sub> polymorph  $\alpha$  and  $\gamma$  (green),  $\alpha$  and  $\beta$  (purple),  $\beta$  and  $\gamma$  (orange) as a function of pressure (i.e.  $\Delta U_{\alpha-\beta} = U_{\alpha} - U_{\beta}$ ,  $\Delta PV_{\alpha-\beta} = PV_{\alpha} - PV_{\beta}$ ,  $\Delta H_{\alpha-\beta} = H_{\alpha} - H_{\beta}$ , etc.). Phase transition between the involved polymorphs can be expected when their enthalpy difference is equal to zero. Dashed lines are given as a linearization of the calculated data (see Table S5).

**Table S5.** Linear equations for Enthalpies with  $R^2$  coefficients calculated for enthalpy difference data calculated using periodic DFT.

| Phase transition            | Number of points at different pressures | Equation               | $R^2$ coefficient |
|-----------------------------|-----------------------------------------|------------------------|-------------------|
| $\alpha \rightarrow \beta$  | 7                                       | $y = 1.4791x - 0.429$  | 0.6975            |
| $\alpha \rightarrow \gamma$ | 7                                       | $y = 9.2378x - 2.6462$ | 0.9865            |
| $\beta \rightarrow \gamma$  | 7                                       | $y = 7.7587x - 2.2171$ | 0.9973            |

**Table S6.** Phase transitions of *p*-Tol<sub>2</sub>S<sub>2</sub> polymorphs under pressure according to various experimental and computational techniques.

| Phase Transition            | Pressure, GPa                    |          |                    |
|-----------------------------|----------------------------------|----------|--------------------|
|                             | Experimental data                | FF based | Periodic DFT based |
| $\alpha \rightarrow \beta$  | 1.60                             | 1.45     | Do not occur*      |
| $\alpha \rightarrow \gamma$ | 0.45                             | 0.44     | 0.34               |
| $\gamma \rightarrow \beta$  | Beyond 0.0–3.0 GPa, if any occur | 6.12**   | Do not occur       |

\*Do not occur based on thermodynamic approach, but happens due to high transition state energies of  $\alpha \rightarrow \gamma$  transformation.

\*\*Based on linearization of polymorphs enthalpies.

Important to note that direct comparison of methods regarding phase transitions should be avoided, due to different limitations of these techniques: periodic DFT shows thermodynamic (but not kinetic) factors, FF approach is linearized to access predictive options and contain significant uncertainties outside experimental range, experimental data provide limited information from one experimental technique.
